# Supplementary material
Source: PubMed Central journal article supplement (PMC5157923)
Supplement: NIHMS828502-supplement-Supplemental.pdf [file NIHMS828502-supplement-Supplemental.pdf]

## Supplementary Online Content

Weintraub D, Chiang C, Kim HM, et al. Association of antipsychotic use with mortality risk in patients with Parkinson disease. *JAMA Neurol*. Published online March 21, 2016. doi:10.1001/jamaneurol.2016.0031.

**eTable 1.** Characteristics of Study Patients by Antipsychotic Use

**eTable 2.** Adjusted Hazard Ratios for 180-Day Mortality in AP Users and Nonusers by Time of Death (ITT Analysis)

**eTable 3.** Adjusted Hazard Ratios For 180-Day Mortality by Antipsychotic by Time of Death (ITT Analysis)

**eTable 4.** Causes of Death in AP Users and Nonusers

**eFigure.** Mortality Rates in AP Users vs Nonusers

This supplementary material has been provided by the authors to give readers additional information about their work.

**eTable 1. Characteristics of Study Patients by Antipsychotic Use<sup>a</sup>**

| Variable                                         | AP Users<br>(N=7877) |      | AP Nonusers<br>(N=7877) |      | P value         |
|--------------------------------------------------|----------------------|------|-------------------------|------|-----------------|
|                                                  | N                    | %    | N                       | %    |                 |
| Age group (years)                                |                      |      |                         |      |                 |
| 50-55                                            | 103                  | 1.3  | 93                      | 1.2  | .887            |
| 55-60                                            | 257                  | 3.3  | 257                     | 3.3  |                 |
| 60-65                                            | 383                  | 4.9  | 393                     | 5.0  |                 |
| 65-69                                            | 674                  | 8.6  | 635                     | 8.1  |                 |
| 70-74                                            | 1439                 | 18.3 | 1453                    | 18.4 |                 |
| 75-79                                            | 2260                 | 28.7 | 2311                    | 29.3 |                 |
| 80-84                                            | 1960                 | 24.9 | 1963                    | 24.9 |                 |
| 85+                                              | 801                  | 10.2 | 772                     | 9.8  |                 |
| Female                                           | 65                   | 0.8  | 65                      | 0.8  | NC <sup>b</sup> |
| Race                                             |                      |      |                         |      |                 |
| White                                            | 6183                 | 78.5 | 6183                    | 78.5 | NC <sup>b</sup> |
| Black                                            | 211                  | 2.7  | 211                     | 2.7  |                 |
| Other                                            | 53                   | 0.7  | 53                      | 0.7  |                 |
| Unknown                                          | 1430                 | 18.2 | 1430                    | 18.2 |                 |
| Married                                          | 6153                 | 78.1 | 5929                    | 75.3 | <.001           |
| Time from PD diagnosis to index date             |                      |      |                         |      |                 |
| <1 year                                          | 1465                 | 18.6 | 1536                    | 19.5 | .440            |
| 1-3 years                                        | 3044                 | 38.6 | 3014                    | 38.3 |                 |
| 3-5 years                                        | 1812                 | 23.0 | 1758                    | 22.3 |                 |
| >= 5 years                                       | 1556                 | 19.8 | 1569                    | 19.9 |                 |
| New non-psychotropic medication use <sup>c</sup> | 1574                 | 20.0 | 1574                    | 20.0 | NC <sup>b</sup> |
| New psychotropic medication use <sup>c</sup>     | 1257                 | 16.0 | 171                     | 2.2  | <.001           |
| Benzodiazepine use <sup>d</sup>                  | 2150                 | 27.3 | 1320                    | 16.8 | <.001           |
| Cholinesterase inhibitor use <sup>d</sup>        | 1519                 | 19.3 | 818                     | 10.4 | <.001           |
| Antidepressant use <sup>d</sup>                  | 4533                 | 57.5 | 3130                    | 39.7 | <.001           |
| Opioid use <sup>d</sup>                          | 2086                 | 26.5 | 1982                    | 25.2 | .058            |
| Depression diagnosis                             | 2316                 | 29.4 | 1523                    | 19.3 | <.001           |
| Dementia diagnosis                               | 603                  | 7.7  | 603                     | 7.7  | NC <sup>b</sup> |

© 2016 American Medical Association. All rights reserved.

|                                                                                 |      |      |      |      |                 |
|---------------------------------------------------------------------------------|------|------|------|------|-----------------|
| Time from dementia diagnosis to index date (for dementia patients) <sup>e</sup> |      |      |      |      |                 |
| < 1 year                                                                        | 405  | 67.1 | 395  | 65.5 | .822            |
| 1- 3 years                                                                      | 153  | 25.4 | 162  | 26.9 |                 |
| >= 3 years                                                                      | 45   | 7.5  | 46   | 7.6  |                 |
| Delirium diagnosis                                                              | 1304 | 16.6 | 1304 | 16.6 | NC <sup>b</sup> |
| Psychosis (other than bipolar disorder or schizophrenia)                        | 1259 | 16.0 | 258  | 3.3  | <.001           |
| Any substance abuse disorder                                                    | 124  | 1.6  | 119  | 1.5  | .747            |
| For dementia patients <sup>e</sup>                                              | 15   | 2.5  | 10   | 1.7  | .312            |
| For non-dementia patients <sup>f</sup>                                          | 109  | 1.5  | 109  | 1.5  | NC <sup>b</sup> |
| Alcohol abuse disorder                                                          | 45   | 0.6  | 94   | 1.2  | <.001           |
| Drug abuse disorder                                                             | 93   | 1.2  | 39   | 0.5  | <.001           |
| Post-traumatic stress disorder diagnosis                                        | 417  | 5.3  | 408  | 5.2  | .748            |
| For dementia patients <sup>e</sup>                                              | 25   | 4.2  | 16   | 2.7  | .153            |
| For non-dementia patients <sup>f</sup>                                          | 392  | 5.4  | 392  | 5.4  | NC <sup>b</sup> |
| Other anxiety disorder diagnosis                                                | 769  | 9.8  | 476  | 6.0  | <.001           |
| Personality disorder diagnosis                                                  | 28   | 0.4  | 13   | 0.2  | .019            |
| Charlson Comorbidity Index                                                      |      |      |      |      |                 |
| 0                                                                               | 4068 | 51.6 | 4068 | 51.6 | NC <sup>b</sup> |
| 1                                                                               | 1644 | 20.9 | 1644 | 20.9 |                 |
| >1                                                                              | 2165 | 27.5 | 2165 | 27.5 |                 |
| Diseases in Charlson Comorbidity Index                                          |      |      |      |      |                 |
| Myocardial infarction                                                           | 232  | 2.9  | 234  | 3.0  | .925            |
| Congestive heart failure                                                        | 597  | 7.6  | 563  | 7.1  | .300            |
| Peripheral vascular disease                                                     | 330  | 4.2  | 366  | 4.6  | .163            |
| Cerebrovascular disease                                                         | 873  | 11.1 | 797  | 10.1 | .049            |
| Chronic obstructive pulmonary disease                                           | 894  | 11.3 | 1016 | 12.9 | .003            |
| Rheumatologic disease                                                           | 91   | 1.2  | 92   | 1.2  | .941            |
| Peptic ulcer disease                                                            | 126  | 1.6  | 120  | 1.5  | .700            |
| Cirrhosis                                                                       | 20   | 0.3  | 25   | 0.3  | .455            |
| Hepatic failure                                                                 | 5    | 0.1  | 10   | 0.1  | .196            |
| Diabetes mellitus                                                               | 1156 | 14.7 | 1226 | 15.6 | .120            |

© 2016 American Medical Association. All rights reserved.

|                                                       |      |      |      |      |                 |
|-------------------------------------------------------|------|------|------|------|-----------------|
| Diabetes mellitus with complications                  | 342  | 4.3  | 392  | 5.0  | .059            |
| Hemiplegia                                            | 102  | 1.3  | 98   | 1.2  | .776            |
| Chronic renal disease                                 | 423  | 5.4  | 498  | 6.3  | .011            |
| Malignant neoplasm                                    | 748  | 9.5  | 703  | 8.9  | .215            |
| Leukemia                                              | 45   | 0.6  | 28   | 0.4  | .046            |
| Lymphomas                                             | 23   | 0.3  | 19   | 0.2  | .537            |
| Metastatic solid tumor                                | 41   | 0.5  | 30   | 0.4  | .191            |
| AIDS                                                  | 10   | 0.1  | 5    | 0.1  | .196            |
| HIV+ without AIDS                                     | 1    | <0.1 | 0    | 0.0  | .317            |
| Number non-psychiatric outpatient visits <sup>g</sup> |      |      |      |      |                 |
| 0                                                     | 638  | 8.1  | 1294 | 16.4 | <.001           |
| 1-2                                                   | 4104 | 52.1 | 4330 | 55.0 |                 |
| 3-4                                                   | 1921 | 24.4 | 1460 | 18.5 |                 |
| >=5                                                   | 1214 | 15.4 | 793  | 10.1 |                 |
| Number psychiatric outpatient visits <sup>g</sup>     |      |      |      |      |                 |
| 0                                                     | 5834 | 74.1 | 6987 | 88.7 | <.001           |
| 1                                                     | 1065 | 13.5 | 450  | 5.7  |                 |
| >1                                                    | 978  | 12.4 | 440  | 5.6  |                 |
| Neurologist visit for Parkinson's disease (past year) | 2009 | 25.5 | 1423 | 18.1 | <.001           |
| Any hospitalization (past year)                       | 652  | 8.3  | 652  | 8.3  | NC <sup>b</sup> |
| Psychiatric hospitalization                           | 36   | 0.5  | 24   | 0.3  | .121            |
| Non-psychiatric hospitalization                       | 629  | 8.0  | 642  | 8.2  | .704            |
| Nursing home stay (past year)                         | 186  | 2.4  | 153  | 1.9  | .070            |
| Days of hospitalization (past year)                   |      |      |      |      |                 |
| 0                                                     | 7225 | 91.7 | 7225 | 91.7 | .109            |
| 1-5                                                   | 232  | 2.9  | 269  | 3.4  |                 |
| >5                                                    | 420  | 5.3  | 383  | 4.9  |                 |
| Days in nursing home (past year)                      |      |      |      |      |                 |
| 0                                                     | 7691 | 97.6 | 7724 | 98.1 | .177            |
| 1-30                                                  | 110  | 1.4  | 87   | 1.1  |                 |
| >30                                                   | 76   | 1.0  | 66   | 0.8  |                 |
| Fiscal year of index date                             |      |      |      |      |                 |

|                                  |      |      |      |      |                 |
|----------------------------------|------|------|------|------|-----------------|
| 1999                             | 245  | 3.11 | 245  | 3.11 | NC <sup>b</sup> |
| 2000                             | 495  | 6.3  | 495  | 6.3  |                 |
| 2001                             | 709  | 9.0  | 709  | 9.0  |                 |
| 2002                             | 855  | 10.9 | 855  | 10.9 |                 |
| 2003                             | 939  | 11.9 | 939  | 11.9 |                 |
| 2004                             | 901  | 11.4 | 901  | 11.4 |                 |
| 2005                             | 864  | 11.0 | 864  | 11.0 |                 |
| 2006                             | 698  | 8.9  | 698  | 8.9  |                 |
| 2007                             | 637  | 8.1  | 637  | 8.1  |                 |
| 2008                             | 593  | 7.5  | 593  | 7.5  |                 |
| 2009                             | 552  | 7.0  | 552  | 7.0  |                 |
| 2010                             | 389  | 4.9  | 389  | 4.9  |                 |
| Urban facility                   | 7045 | 89.4 | 6905 | 87.7 | <.001           |
| Facility size (number of beds)   |      |      |      |      |                 |
| <=200                            | 2056 | 26.1 | 2015 | 25.6 | .002            |
| 201-400                          | 2036 | 25.8 | 2006 | 25.5 |                 |
| 401-600                          | 1907 | 24.2 | 1894 | 24.0 |                 |
| >600                             | 1792 | 22.7 | 1815 | 23.0 |                 |
| Academic affiliation of facility |      |      |      |      |                 |
| Low                              | 2001 | 25.4 | 2317 | 29.4 | <.001           |
| Limited                          | 2290 | 29.1 | 2137 | 27.1 |                 |
| High                             | 3586 | 45.5 | 3423 | 43.5 |                 |

<sup>a</sup> All use and diagnostic data are based on 1 year prior to the index date unless otherwise specified.

<sup>b</sup> NC - not computed due to matching between antipsychotic users and nonusers.

<sup>c</sup> Within 14 days prior to index date.

<sup>d</sup> Within 365 days prior to index date.

<sup>e</sup> N=603 pairs for dementia group.

<sup>f</sup> N=7274 pairs for non-dementia group.

<sup>g</sup> Within 180 days prior to index date.

**eTable 2. Adjusted Hazard Ratios for 180-Day Mortality in AP Users and Nonusers by Time of Death (ITT Analysis)**

| Group               | Any Death<br>(7877 pairs) |                 | Death after 4 weeks<br>(7699 pairs) |                 |
|---------------------|---------------------------|-----------------|-------------------------------------|-----------------|
|                     | Hazard Ratio<br>(95% CI)  | <i>P</i> value* | Hazard Ratio<br>(95% CI)            | <i>P</i> value* |
| No AP use           | 1.0                       |                 | 1.0                                 |                 |
| AP user             | 2.35 ( 2.08-2.66)         | <.001           | 2.30 ( 2.01-2.64)                   | <.001           |
| No AP use           | 1.0                       |                 | 1.0                                 |                 |
| Atypical AP<br>user | 2.26 ( 1.98-2.57)         | <.001           | 2.20 ( 1.90-2.55)                   | <.001           |
| Typical AP<br>user  | 3.65 ( 2.47-5.39)         | <.001           | 3.98 ( 2.50-6.34)                   | <.001           |

**\**P* values were obtained from testing for the significance of the parameter estimates obtained from the corresponding Cox proportional hazards regression model.**

**eTable 3. Adjusted Hazard Ratios For 180-Day Mortality by Antipsychotic by Time of Death (ITT Analysis)**

| Group             | Any Death<br>(7877 pairs) |                 | Death after 4 weeks<br>(7699 pairs) |                 |
|-------------------|---------------------------|-----------------|-------------------------------------|-----------------|
|                   | Hazard Ratio<br>(95% CI)  | <i>P</i> value* | Hazard Ratio<br>(95% CI)            | <i>P</i> value* |
| No AP use         | 1.0                       |                 | 1.0                                 |                 |
| Haloperidol       | 5.08 ( 3.16-8.16)         | <.001           | 4.34 ( 2.57-7.32)                   | <.001           |
| Other typical AP  | 1.82 ( 0.94-3.50)         | .07             | 3.06 ( 0.98-9.56)                   | .05             |
| Olanzapine        | 2.79 ( 1.97-3.96)         | <.001           | 2.48 ( 1.73-3.57)                   | <.001           |
| Quetiapine        | 2.16 ( 1.88-2.48)         | <.001           | 2.11 ( 1.80-2.47)                   | <.001           |
| Risperidone       | 2.46 ( 1.94-3.12)         | <.001           | 2.48 ( 1.94-3.16)                   | <.001           |
| Other atypical AP | 1.19 ( 0.60-2.37)         | .62             | 1.48 ( 0.67-3.27)                   | .33             |

**\**P* values were obtained from testing for the significance of the parameter estimates obtained from the corresponding Cox proportional hazards regression model.**

**eTable 4. Causes of Death in AP Users and Nonusers**

| AP users                      |              |      | AP nonusers                   |              |      |
|-------------------------------|--------------|------|-------------------------------|--------------|------|
| Cause of death                | No.<br>(832) | %    | Cause of death                | No.<br>(427) | %    |
| Parkinson's disease           | 443          | 53.2 | Cardiovascular diseases       | 246          | 57.6 |
| Cardiovascular diseases       | 423          | 50.8 | Parkinson's disease           | 165          | 38.6 |
| All other diseases (residual) | 313          | 37.6 | All other diseases (residual) | 164          | 38.4 |
| Influenza and pneumonia       | 127          | 15.3 | Malignant neoplasms           | 62           | 14.5 |
| Clinical-Laboratory findings  | 110          | 13.2 | Clinical-Laboratory findings  | 60           | 14.1 |
| Malignant neoplasms           | 103          | 12.4 | Influenza and pneumonia       | 57           | 13.3 |
| Pneumonitis                   | 85           | 10.2 | Lower respiratory diseases    | 42           | 9.8  |
| Diabetes mellitus             | 72           | 8.7  | Accidents                     | 34           | 8.0  |
| Lower respiratory diseases    | 65           | 7.8  | Kidney diseases               | 33           | 7.7  |
| Other respiratory diseases    | 62           | 7.5  | Septicemia                    | 33           | 7.7  |
| Kidney diseases               | 61           | 7.3  | Other respiratory diseases    | 31           | 7.3  |
| Septicemia                    | 53           | 6.4  | Pneumonitis                   | 29           | 6.8  |
| Accidents                     | 45           | 5.4  | Diabetes mellitus             | 27           | 6.3  |
| Alzheimer's disease           | 40           | 4.8  | Circulatory system disorders  | 12           | 2.8  |
| Nutritional deficiencies      | 11           | 1.3  | Alzheimer's disease           | 10           | 2.3  |



**eFigure. Mortality Rates in AP Users vs Nonusers**

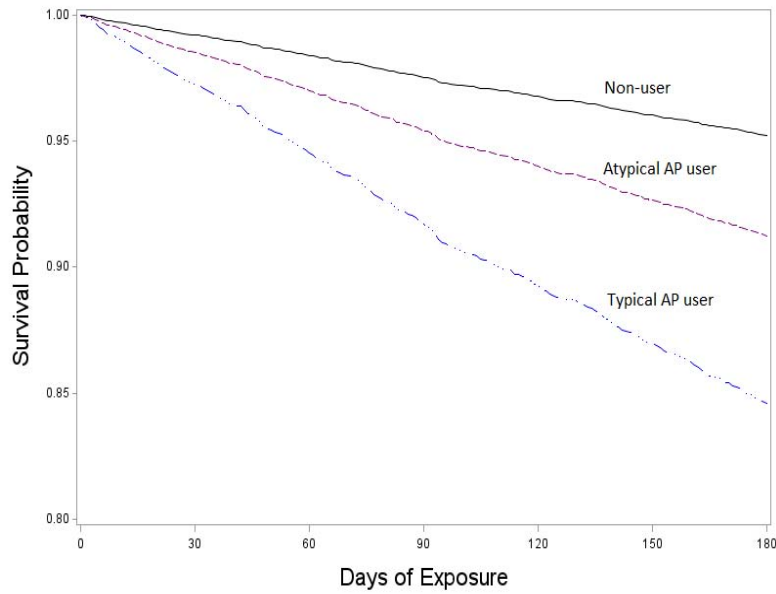

|                  | Number of patients at risk |      |      |      |      |      |      |
|------------------|----------------------------|------|------|------|------|------|------|
|                  | 0                          | 30   | 60   | 90   | 120  | 150  | 180  |
| Nonuser          | 7877                       | 7698 | 7555 | 7416 | 7291 | 7170 | 7062 |
| Atypical AP user | 7455                       | 7158 | 6856 | 4517 | 3845 | 2918 | 2557 |
| Typical AP user  | 422                        | 377  | 322  | 165  | 116  | 84   | 73   |

Covariate-adjusted 180-day survival estimates by baseline antipsychotic treatment status (exposure only). Graph is done based on Cox regression ignoring pairing.
